# Supplementary material for: A Random Forest-Based Multi-Index Classification (RaFMIC) Approach to Mapping Three-Decadal Inundation Dynamics in Dryland Wetlands Using Google Earth Engine
Source: MDPI journal article supplement (doi:10.3390/rs15051263), 2023-02-24
Supplement: s1 [file s1]

Overall accuracy of the model validation at different number of trees calculated with GEE.

| Number of trees | Landsat-5 | Landsat-7 | Landsat-8 |
|-----------------|-----------|-----------|-----------|
| 2               | 0.9980    | 0.9743    | 0.9997    |
| 3               | 0.9985    | 0.9743    | 0.9997    |
| 4               | 0.9984    | 0.9743    | 0.9997    |
| 5               | 0.9986    | 0.9743    | 0.9997    |
| 6               | 0.9986    | 0.9743    | 0.9996    |
| 7               | 0.9987    | 0.9743    | 0.9998    |
| 8               | 0.9987    | 0.9743    | 0.9998    |
| 9               | 0.9987    | 0.9743    | 0.9998    |
| 10              | 0.9988    | 0.9743    | 0.9998    |
| 11              | 0.9988    | 0.9743    | 0.9997    |
| 12              | 0.9988    | 0.9743    | 0.9997    |
| 13              | 0.9988    | 0.9743    | 0.9997    |
| 14              | 0.9988    | 0.9745    | 0.9997    |
| 15              | 0.9988    | 0.9743    | 0.9997    |
